# Supplementary material for: Protective Effect of Pyrogallol-phloroglucinol-6,6-bieckol from <em>Ecklonia cava</em> on Monocyte-Associated Vascular Dysfunction
Source: Preprints.org preprint supplement (doi:10.20944/preprints201810.0530.v1), 2018-10-23
Supplement: Supplementary file 1 [file supplementary]

## Supplementary Figure

Supplementary Figure 1. HPLC chromatograms and purity of four compounds from *E. cava* extract

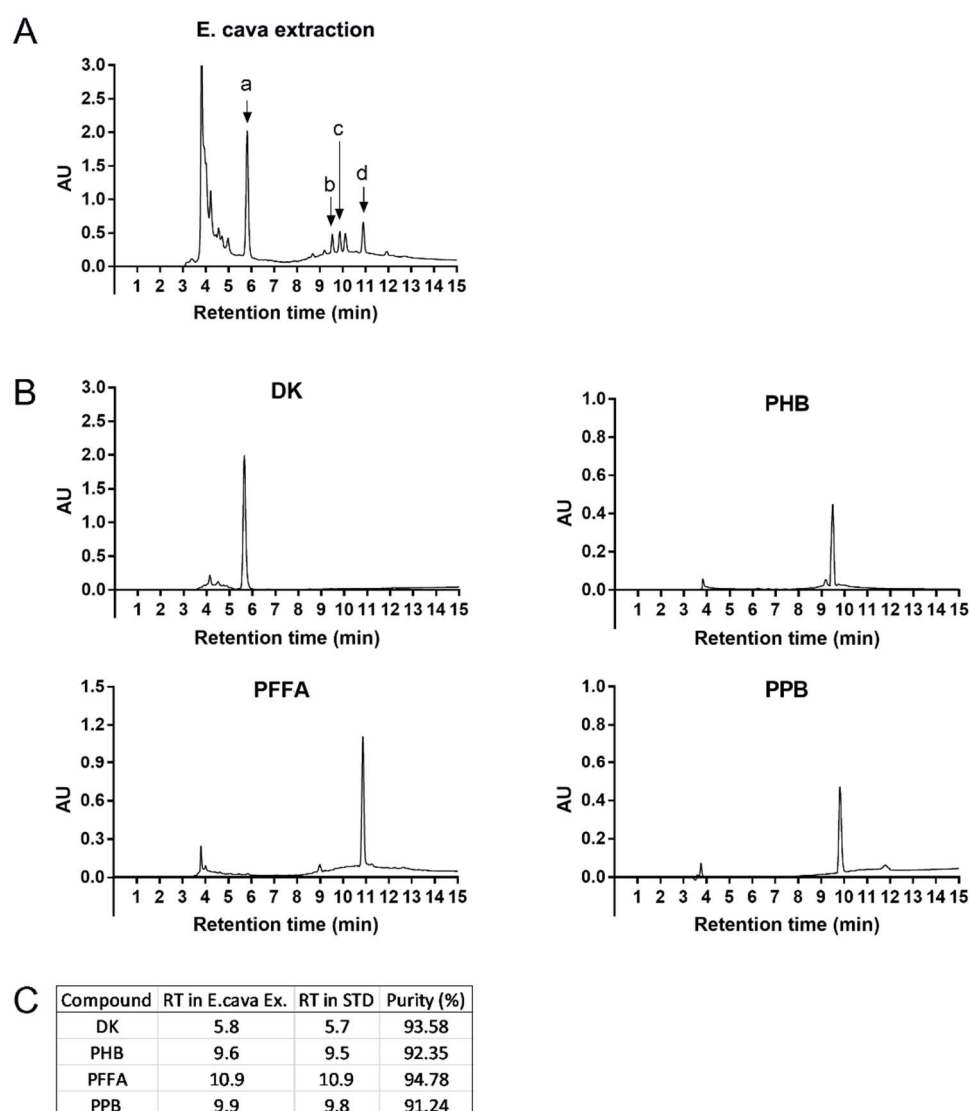

(A) HPLC chromatograms of *E. cava*. The peaks labeled a-d correspond to dieckol, PHB, PPB and PFFA, respectively and checked purity of them. a: dieckol, b: 2,7-phloroglucinol-6,6-bieckol (PHB), c: pyrogallol-phloroglucinol-6,6-bieckol (PPB), d: phlorofucofuroeckol-A (PFFA). (B) Separately isolated single compound was validated HPLC chromatograms. (C) Purity of isolated four compounds from *E. cava* extract

Supplementary Figure 2. Mass spectrometry analysis of four compounds from *E. cava* extract

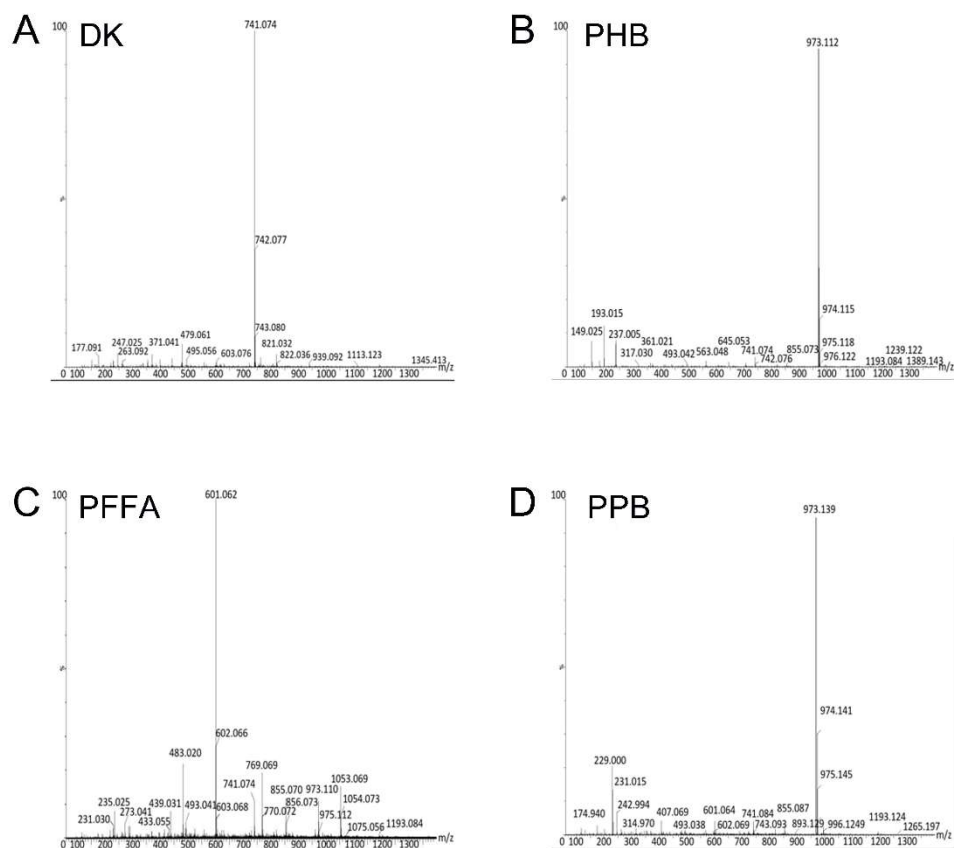

ESI-MS spectra of isolated four phlorotannins. (A) DK (B) PHB (C) PFFA and (D) PPB were validated. DK: dieckol, PHB: 2,7-phloroglucinol-6,6-bieckol, PFFA: phlorofucofuroeckol-A, PPB: pyrogallol-phloroglucinol-6,6-bieckol

**Supplementary Figure 3. Inhibitory effects of PPB in monocyte polarization and related cytokines**

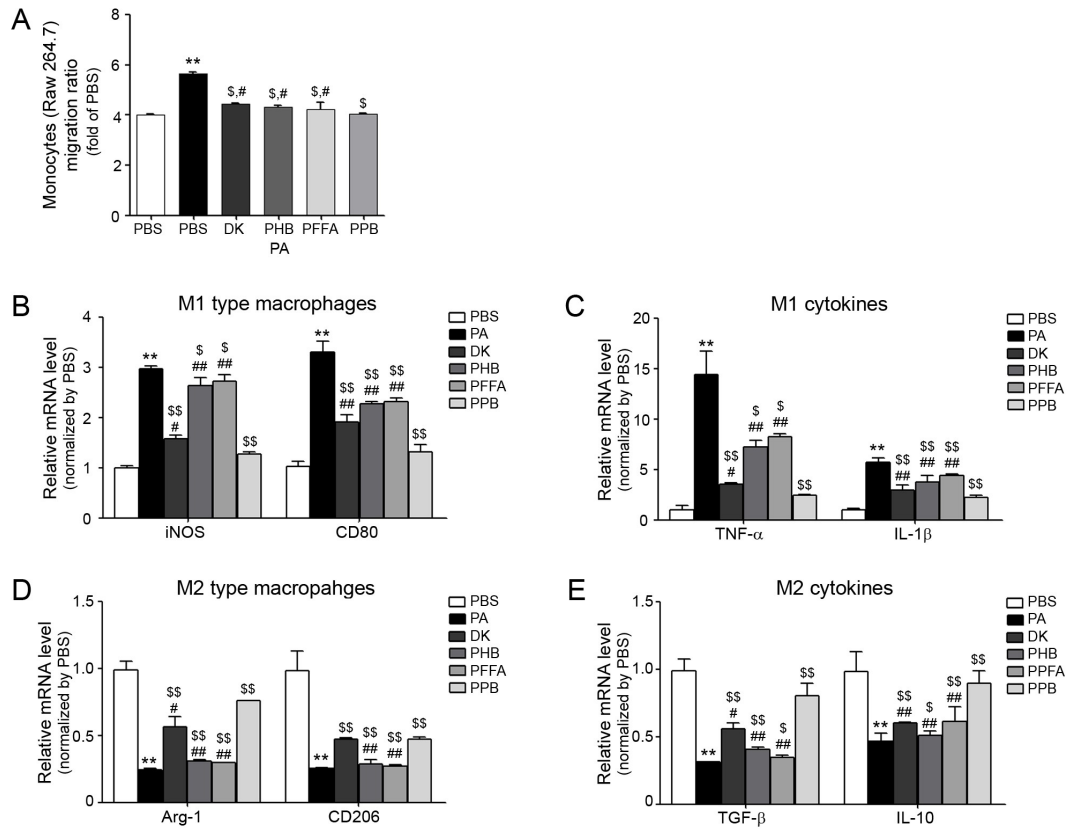

(A) Migrating Raw 264.7 cell levels in 4 compounds with PA-BSA as determined by the trans-well migration assay. (B, C) mRNA expression levels of M1 type macrophages marker (*iNOS* and *Cd80*) and M2 type macrophages marker (*Arg-1* and *Cd206*) as determined by qRT-PCR. (D, E) mRNA expression levels of M1 type macrophages related cytokines (*TNF- $\alpha$*  and *IL-1 $\beta$* ) and M2 type macrophages related cytokines (*TGF- $\beta$*  and *IL-10*) by qRT-PCR. \*\*,  $P < 0.01$ , \*\*\*,  $P < 0.001$ , vs. PBS; \$,  $P < 0.05$ , \$\$,  $P < 0.01$ , vs. PA-BSA; #,  $P < 0.05$ , ##,  $P < 0.01$ , vs. PA-BSA with PPB, DK; dieckol, PHB; 2,7-phloroglucinol-6,6-bieckol, PFFA; phlorofucofuroeckol-A, PPB; pyrogallol-phloroglucinol-6,6-bieckol.

**Supplementary Figure 4. Inhibitory effects of PPB in Raw 264.7 cell-associated endothelial cell death**

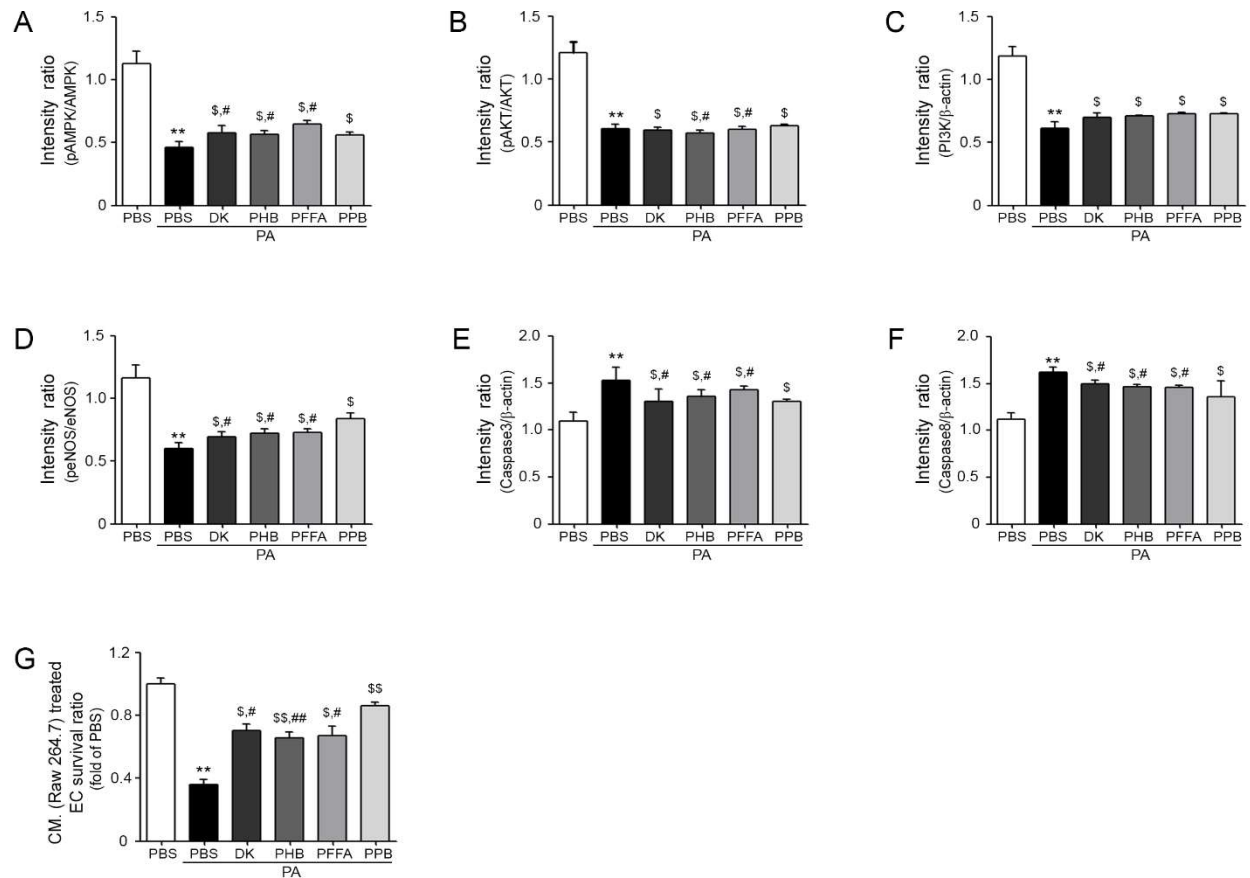

(A-F) Protein level graph shows quantified protein levels of cell-death related molecules, that is, (B) pAMPK/AMPK, (C) pAKT/AKT, (D) PI3K (E) peNOS/eNOS, (F) Caspase 3, and (G) Caspase 8. (G) Conditioned medium (CM) collected from PA-BSA with or without four compound treated Raw 264.7 cell. ECs were validated after CM treatment by a cell survival assay. \*,  $P < 0.05$ , \*\*,  $P < 0.01$ , \*\*\*,  $P < 0.001$ , vs. PBS; \$,  $P < 0.05$ , \$\$,  $P < 0.01$ , \$\$\$,  $P < 0.001$ , vs. PA-BSA; #,  $P < 0.05$ , ##,  $P < 0.01$ , ###,  $P < 0.001$  vs. PA-BSA with PPB, DK; dieckol, PHB; 2,7-phloroglucinol-6,6-bieckol, PFFA; phlorofucofuroeckol-A, PPB; pyrogallol-phloroglucinol-6,6-bieckol.

**Supplementary Figure 5. Inhibitory effects of PPB in Raw 264.7-associated VSMC proliferation and migration**

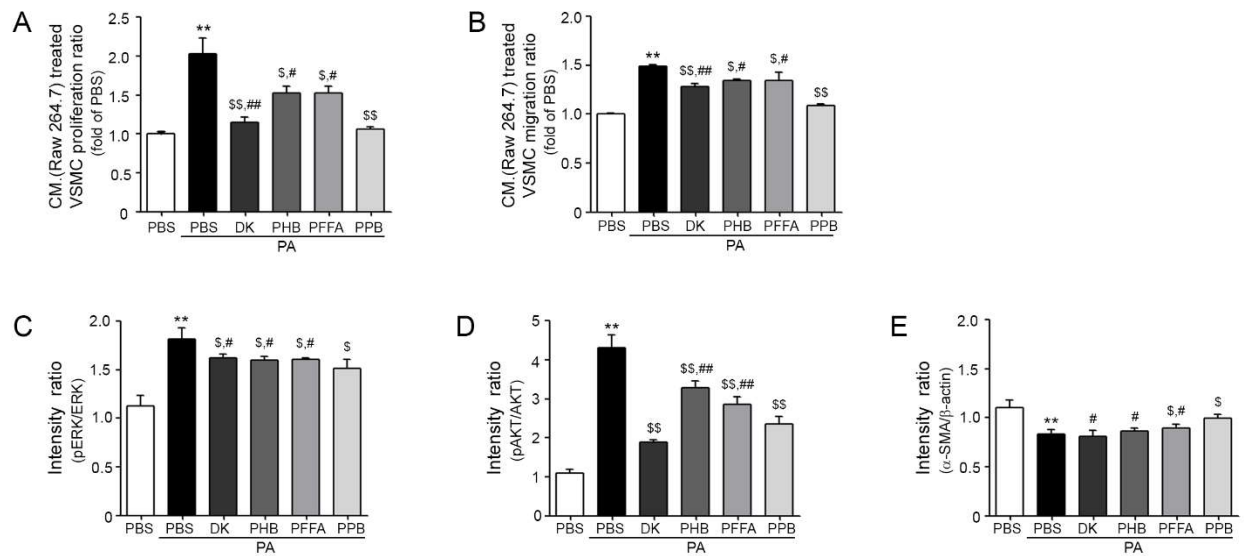

(A) Conditioned medium (CM) collected from PA-BSA with or without four compound treated Raw 264.7 cell. VSMC proliferation were measured using a proliferation assay after CM treatment (B) Trans-migrating VSMC numbers were measured using a trans-migration assay. (C-E) Protein level graph shows quantified protein levels of proliferation and migration related molecules, that is, (C) pERK/ERK, (D) pAKT/AKT, (E)  $\alpha$ -SMA. \*\*,  $P < 0.01$ , \*\*\*,  $P < 0.001$ , vs. PBS; \$,  $P < 0.05$ , \$\$,  $P < 0.01$ , vs. PA-BSA; #,  $P < 0.05$ , ##,  $P < 0.01$ , vs. PA-BSA with PPB, DK; dieckol, PHB; 2,7-phloroglucinol-6,6-bieckol, PFPA; phlorofucofuroeckol-A, PPB; pyrogallol-phloroglucinol-6,6-bieckol.

## Supplementary Tables

**Supplementary Table 1. List of antibodies for Western blotting**

| <b>Antibody name</b>          | <b>Company</b> | <b>Cat. No.</b> | <b>Dilution rate</b> |
|-------------------------------|----------------|-----------------|----------------------|
| $\beta$ -actin                | Cell signaling | 4967s           | 1:1,000              |
| ERK                           | Cell signaling | 9102s           | 1:1,000              |
| Phospho-ERK                   | Cell signaling | 9101s           | 1:1,000              |
| AKT                           | Abcam          | 81283S          | 1:1,000              |
| Phospho-AKT                   | Ab5076         | Ab5076          | 1:5,000              |
| AMPK                          | Abcam          | Ab207442        | 1:1,000              |
| Phospho-AMPK                  | Abcam          | Ab133448        | 1:1,000              |
| eNOS                          | Thermo Fisher  | PA3-031A        | 1:1,000              |
| Phospho-eNOS                  | Cell signaling | 9571            | 1:1,000              |
| PI3K                          | FineTest       | FNab06422       | 1:1,000              |
| $\alpha$ -Smooth muscle actin | Abcam          | Ab5694          | 1:1,000              |
| Caspase 3                     | Cell signaling | 9662            | 1:1,000              |
| Caspase 8                     | Cell signaling | 9746            | 1:1,000              |

**Supplementary table 2. List of primer for qRT-PCR**

| Gene              |         | Primers                                |
|-------------------|---------|----------------------------------------|
| <i>β-actin</i>    | Forward | 5'-ACA AAG CTG TTC AGT GTC TCC A-3'    |
|                   | Reverse | 5'-CTC CGT TTC CAG AAT ACA CAC A-3'    |
| <i>iNOS</i>       | Forward | 5'- CACAGCAATATAGGCTCATCCA-3'          |
|                   | Reverse | 5'- AGCCTCATGGTAAACACGTTCT-3'          |
| <i>CD80</i>       | Forward | 5'-GACCGAATCTACTGGCAAAAAC-3'           |
|                   | Reverse | 5'-TTCTTATACTCGGGCCACACTT-3'           |
| <i>CD206</i>      | Forward | 5'-TGTATTCTTTGCCTTTCCCAGT-3'           |
|                   | Reverse | 5'-GATAAAAGCCAGAAGCAGGAGA-3'           |
| <i>Arg-1</i>      | Forward | 5'-ACAGAACTAAGCAAACGCCTTC-3'           |
|                   | Reverse | 5'-AGAAAGGAACTGCTGGGATACA-3'           |
| <i>TNF-α</i>      | Forward | 5'-TTCTGTCTACTGAACTTCGGGGTGATCGGTCC-3' |
|                   | Reverse | 5'-GTATGAGATAGCAAATCGGCTGACGGTGTGGG-3' |
| <i>IL-1β</i>      | Forward | 5'-CTTTTCGTGAATGAGCAGACAG-3'           |
|                   | Reverse | 5'-TCAGCTTCAATGAAAGACCTCA-3'           |
| <i>TGF-β</i>      | Forward | 5'- CTGGCAGTAGCTCCCCTATTTA-3'          |
|                   | Reverse | 5'- ACCAGGGTAAAAATCGAGATGA-3'          |
| <i>IL-10</i>      | Forward | 5'-ATGGTGTCTTTCAATTGCTCT-3'            |
|                   | Reverse | 5'-AGGATCTCCCTGGTTTCTCTTC-3'           |
| <i>E-selectin</i> | Forward | 5'-ATGAAATGTCTTCCCAGTGCTT-3'           |
|                   | Reverse | 5'-TGATCCCTTCAGTTCAAATCCT-3'           |
| <i>ICAM-1</i>     | Forward | 5'-ATAACCGCCAGAGAAAGATCA -3'           |
|                   | Reverse | 5'-GGCTTGTCCCTTGAGTTTTATG-3'           |
| <i>VCAM-1</i>     | Forward | 5'- GAGACCTGTCACTGTCAACTGC -3'         |
|                   | Reverse | 5'- CATCAGTGTAGTCTCCCCCTTC -3'         |
| <i>vWF</i>        | Forward | 5'-AAAGCTCCAGCAAGTTGAAGAC-3'           |
|                   | Reverse | 5'-CATCCACACAAACTCCAGAAAA-3'           |

## **Supplementary materials and methods**

### **High-performance liquid chromatography**

A reverse phase High-performance liquid chromatography (HPLC) system comprising an Poroshell 120 C18 column (4  $\mu$ m, 4.6  $\times$  150 mm; Agilent) was used to further purify the selected fraction (Alliance 2695; Waters Corp., MA, USA). This was connected to a photodiode array detector (Waters Corp). Gradient elution was performed with 0.1% Formic acid (FA) and water as the eluents. Between 0 min and 2 mins, 43% of the FA and methanol and to 8 mins, 70% of the FA and methanol and to 15 mins 100% of the FA and methanol and to 30 mins 43% of the FA and methanol were used. The column flow rate was maintained at 0.4 mL/min and injection volume was 10  $\mu$ L. We finally confirmed purity of four phlorotannins is more than 90% was used in the study.

### **Mass spectrometry analysis**

This analysis was performed following previous study [1]. Briefly, Electrospray ionization (ESI)/spectrometry (MS) analyses were performed using a Hewlett-Packard 1100 series HPLC system equipped with a DAD detector, a degasser, an auto-sampler, a column oven and a binary pump (Hewlett-Packard; Waldbronn, Germany) coupled to a Finnigan MAT LCQ ion-trap mass spectrometer (Finnigan MAT; CA, USA). The MS was equipped with a Finnigan electrospray source and was capable of analyzing ions up to 2000 m/z. Negative ion mass spectra of the column elute was recorded in the range 100-2000 m/z. The source voltage was set to 5 kV and the capillary temperature to 275  $^{\circ}$ C. The other conditions were as follows: sheath gas, 80 psi (551.6 kPa); inter-octapole lens voltage, 10 V; capillary voltage, -36.5 V; auxiliary gas, 20 psi (137.9 kPa).

### **Raw 264.7 cells cultivation**

Raw 264.7 cells for monocyte/macrophage cell line were purchased from Korea cell bank (Republic of Korea). Dulbecco's Modified Eagle's medium (DMEM; Hyclone) and 1% penicillin-streptomycin (Gibco) were used as growth medium. To investigate the inhibitory effects of DK, PHB, PFFA and PPB in 0.25 mM PA-BSA treated Raw 264.7 cells, we used the same concentration (2.5  $\mu$ g/ml) for a treatment time of 48 hrs. To collect conditioned medium (CM), Raw 264.7 cells were treated with PA-BSA with or without DK, PHB, PFFA or PPB for 48 hrs.



### **Quantification of Western blotting results**

The Western blotting band was quantified by image J program. PI3K, Caspase 3, Caspase 8 and  $\alpha$ -SMA were normalized b-actin. phospho-form proteins including pAMPK-AMPK, pAKT-AKT, peNOS-eNOS were normalized total-form protein.

## Supplementary reference

1. Lee, J.H.; Ko, J.Y.; Oh, J.Y.; Kim, C.Y.; Lee, H.J.; Kim, J.; Jeon, Y.J. Preparative isolation and purification of phlorotannins from *Ecklonia cava* using centrifugal partition chromatography by one-step. *Food Chem.* **2014**, *158*, 433-437.
